# Supplementary material
Source: HighWire-hosted journal article supplement (https://heart.bmj.com/content/109/6/449)
Supplement: inline-supplementary-material-1 [file inline-supplementary-material-1.pdf]

Table S1. Variables used to define cohort entry and exclusion criteria, study exposures, outcomes and adjustment variables.

| Assessment                                                        | Timing                                                                                                                             | Disease, procedure or measure                                                                                                                                | ICD-9 [ICD-10-CA] diagnostic codes in DAD, SDS and NACRS                                                                                                                                                                     | CCP [CCI] procedural codes in DAD, SDS, NACRS                                           | Diagnostic codes in OHIP | Other sources |
|-------------------------------------------------------------------|------------------------------------------------------------------------------------------------------------------------------------|--------------------------------------------------------------------------------------------------------------------------------------------------------------|------------------------------------------------------------------------------------------------------------------------------------------------------------------------------------------------------------------------------|-----------------------------------------------------------------------------------------|--------------------------|---------------|
| <b>Inclusion criteria</b>                                         | At the delivery                                                                                                                    | Any obstetrical hospital livebirth or stillbirth from 20 weeks' gestation onward. Only include women aged 16-50 years, with a valid health insurance number. | MOMBABY (see link at <a href="https://datadictionary.ice.s.on.ca/Applications/DataDictionary/Library.aspx?Library=MOMBABY">https://datadictionary.ice.s.on.ca/Applications/DataDictionary/Library.aspx?Library=MOMBABY</a> ) | --                                                                                      | --                       | --            |
| <b>Exclusion criteria (any dxtype, exclude suspect diagnoses)</b> | ≤ 3 years before the index birth hospitalization discharge date, or < 42 days after the index birth hospitalization discharge date | Coronary artery disease                                                                                                                                      | 410, 411, 413, 414.0, 429.2 [I20, I21, I22, I24, I25.0, I25.1, I51.3]                                                                                                                                                        | 48 [1HZ80, 1IJ50, 1IJ54, 1IJ55, 1IJ57, 1IJ76, 1IJ80, 1IK80, 1IK87, 1IL35, 2IL70, 3IP10] | 410, 412, 413, 429       | --            |
|                                                                   | Same                                                                                                                               | Heart failure                                                                                                                                                | 428 [I50]                                                                                                                                                                                                                    | --                                                                                      | 428                      | --            |
|                                                                   | Same                                                                                                                               | Pericardial disease, endocarditis, myocarditis, cardiomyopathy or peripartum cardiomyopathy, valvular heart disease                                          | 420-425 [I30-I43], 674.5 [O90.3], 390-392 [I00-I02, I05-I09]                                                                                                                                                                 | --                                                                                      | 398                      | --            |
|                                                                   | Same                                                                                                                               | Coronary angiography                                                                                                                                         | --                                                                                                                                                                                                                           | --                                                                                      | --                       | CCN           |
|                                                                   | < 42 days after the index birth hospitalization discharge date                                                                     | Death                                                                                                                                                        | --                                                                                                                                                                                                                           | --                                                                                      | --                       | RPDB          |

| Assessment                                                                                        | Timing                                                                                                     | Disease, procedure or measure                                                                                                                   | ICD-9 [ICD-10-CA] diagnostic codes in DAD, SDS and NACRS | CCP [CCI] procedural codes in DAD, SDS, NACRS | Diagnostic codes in OHIP | Other sources                                                                                                                                                                                                                                                                                             |
|---------------------------------------------------------------------------------------------------|------------------------------------------------------------------------------------------------------------|-------------------------------------------------------------------------------------------------------------------------------------------------|----------------------------------------------------------|-----------------------------------------------|--------------------------|-----------------------------------------------------------------------------------------------------------------------------------------------------------------------------------------------------------------------------------------------------------------------------------------------------------|
| <b>Main study exposures</b>                                                                       | One delivery hospitalization was randomly chosen as the index birth for each woman (Main exposure)         | Preeclampsia or eclampsia in the randomly selected index birth                                                                                  | 642.4-642.7 [O11, O14, O15]                              | --                                            | --                       | --                                                                                                                                                                                                                                                                                                        |
|                                                                                                   | First delivery hospitalization in the study period (Additional analysis #2a)                               | Preeclampsia or eclampsia as a time-varying exposure                                                                                            | Same                                                     | --                                            | --                       | --                                                                                                                                                                                                                                                                                                        |
|                                                                                                   | Any delivery hospitalization in the study period, starting at the first delivery (Additional analysis #2b) | Preeclampsia or eclampsia as a time-varying exposure, assessing the number of times preeclampsia or eclampsia occurred (0, 1 or $\geq 2$ times) | Same                                                     | --                                            | --                       | --                                                                                                                                                                                                                                                                                                        |
| <b>Study outcomes</b><br><br><b>If multiple sequential coronary angiographies, first was used</b> | $\geq 42$ days after the index birth (delivery) discharge date ("time zero")                               | 1) Coronary artery stenosis at coronary angiography                                                                                             | --                                                       | --                                            | --                       | CCN - Having any of the following:<br>a) Left main (LM) $\geq 50\%$ stenosis, or<br>b) Proximal left anterior descending (LAD) $\geq 70\%$ stenosis, or<br>c) Mid or distal LAD $\geq 70\%$ stenosis, or<br>d) Circumflex $\geq 70\%$ stenosis, or<br>e) Right coronary artery (RCA) $\geq 70\%$ stenosis |

| Assessment | Timing | Disease, procedure or measure                                                | ICD-9 [ICD-10-CA] diagnostic codes in DAD, SDS and NACRS | CCP [CCI] procedural codes in DAD, SDS, NACRS | Diagnostic codes in OHIP | Other sources                                                                                                                                                                                                                                                                                                                                                                                                                             |
|------------|--------|------------------------------------------------------------------------------|----------------------------------------------------------|-----------------------------------------------|--------------------------|-------------------------------------------------------------------------------------------------------------------------------------------------------------------------------------------------------------------------------------------------------------------------------------------------------------------------------------------------------------------------------------------------------------------------------------------|
|            | Same   | 2) Multi-vessel obstructive coronary artery stenosis at coronary angiography | --                                                       | --                                            | --                       | CCN - Exclusively having <u>one</u> of the following:<br>a) No disease: < 50% stenosis in all coronary artery branches, or<br>b) 1-vessel disease: ≥ 50% stenosis in one coronary artery, or<br>c) 2-vessel disease: ≥ 50% stenosis in two coronary arteries (or ≥ 50% stenosis of the LM), or<br>d) 3-vessel disease: ≥ 50% stenosis in three coronary arteries (or ≥ 50% stenosis in the LM <u>and also</u> ≥ 70% stenosis in the RCA). |

| Assessment        | Timing                                                          | Disease, procedure or measure                                                                                             | ICD-9 [ICD-10-CA] diagnostic codes in DAD, SDS and NACRS | CCP [CCI] procedural codes in DAD, SDS, NACRS | Diagnostic codes in OHIP | Other sources                                                                                                                                                                                                                                                                                                                                                                   |
|-------------------|-----------------------------------------------------------------|---------------------------------------------------------------------------------------------------------------------------|----------------------------------------------------------|-----------------------------------------------|--------------------------|---------------------------------------------------------------------------------------------------------------------------------------------------------------------------------------------------------------------------------------------------------------------------------------------------------------------------------------------------------------------------------|
|                   |                                                                 | 3) Stenotic coronary artery disease with concomitantly reduced left ventricular function stenosis at coronary angiography | --                                                       | --                                            | --                       | CCN - Having <u>any</u> of the following:<br>a) Left main (LM) $\geq$ 50% stenosis, or<br>b) Proximal left anterior descending (LAD) $\geq$ 70% stenosis, or<br>c) Mid or distal LAD $\geq$ 70% stenosis, or<br>d) Circumflex $\geq$ 70% stenosis, or<br>e) Right coronary artery (RCA) $\geq$ 70% stenosis<br><br>and concomitantly left ventricular ejection fraction $<$ 50% |
|                   | Same                                                            | Death                                                                                                                     |                                                          |                                               |                          | RPDB                                                                                                                                                                                                                                                                                                                                                                            |
| <b>Covariates</b> | At the index birth hospitalization discharge date               | Neighbourhood income quintile (1/missing, 2, 3, 4, 5)                                                                     |                                                          | --                                            | --                       | RPDB, Statistics Canada census data                                                                                                                                                                                                                                                                                                                                             |
|                   | Same                                                            | Residence (rural, urban/missing)                                                                                          |                                                          | --                                            | --                       | RPDB, Statistics Canada census data                                                                                                                                                                                                                                                                                                                                             |
|                   | $<$ 365 d before the index birth hospitalization discharge date | Diabetes mellitus                                                                                                         | 250, 648.8 [E10, E11, E13, E14, O244]                    | --                                            | 250                      | --                                                                                                                                                                                                                                                                                                                                                                              |
|                   | Same                                                            | Chronic hypertension                                                                                                      | 401, 405, 642.0-642.2, 642.7 [I10, I15, O10, O11]        | --                                            | 401                      | --                                                                                                                                                                                                                                                                                                                                                                              |
|                   | Same                                                            | Dyslipidemia                                                                                                              | 272.0, 272.1, 272.2, 272.3, 272.4, 272.5 [E78]           | --                                            | 272                      | --                                                                                                                                                                                                                                                                                                                                                                              |

| Assessment | Timing             | Disease, procedure or measure  | ICD-9 [ICD-10-CA] diagnostic codes in DAD, SDS and NACRS                                                                                                                                                                                                                                                                                                                                                                                                                                                                | CCP [CCI] procedural codes in DAD, SDS, NACRS | Diagnostic codes in OHIP | Other sources |
|------------|--------------------|--------------------------------|-------------------------------------------------------------------------------------------------------------------------------------------------------------------------------------------------------------------------------------------------------------------------------------------------------------------------------------------------------------------------------------------------------------------------------------------------------------------------------------------------------------------------|-----------------------------------------------|--------------------------|---------------|
|            | Same               | Renal disease                  | 669.3, 958.5 634.3, 635.3, 636.3, 637.3, 638.3, 639.3, 250.4x, 274.1x, 403.xx, 404.xx, 405.01, 405.11, 405.91, 440.1, 446.21, 581.xx, 582.xx, 583.xx, 584.5-584.9, 585.x, 586, 587.x, 588.0, 588.8x, 588.9, 590.0x, 593.7x, 791.0, 794.4 [O08.4, T79.5, O90.4, E10.20, E10.21, E10.23, E11.20, E11.21, E11.23, M10.39, I12, I13, I15.0, I70.1, M31.0, N01.x, N03.x, N04.x, N05.x, N06.x, N07.x, N08.x, N11.x, N12, N13.7, N13.8, N13.9, N14.x, N15.x, N16.x, N17.x, N18.x, N19.x, N25.0, N25.8, N25.9, N26, R80, R94.4] | --                                            | 403, 581, 585            | --            |
|            | Same               | Drug dependence or tobacco use | 291, 292, 2940, 303, 304, 305, 648.3, 649.0, 6555, 980 [F10-F19, F55, G312, O354, O355, T51, T652, Z720, Z721, Z722]                                                                                                                                                                                                                                                                                                                                                                                                    | --                                            | 291, 292, 303, 304, 305  | --            |
|            | At the index birth | Pre-pregnancy body mass index  |                                                                                                                                                                                                                                                                                                                                                                                                                                                                                                                         |                                               |                          | BORN          |

| <b>Assessment</b>                                                                           | <b>Timing</b>                                                     | <b>Disease, procedure or measure</b>                  | <b>ICD-9 [ICD-10-CA] diagnostic codes in DAD, SDS and NACRS</b>                                     | <b>CCP [CCI] procedural codes in DAD, SDS, NACRS</b> | <b>Diagnostic codes in OHIP</b> | <b>Other sources</b>         |
|---------------------------------------------------------------------------------------------|-------------------------------------------------------------------|-------------------------------------------------------|-----------------------------------------------------------------------------------------------------|------------------------------------------------------|---------------------------------|------------------------------|
| <b><i>Censoring variables</i></b>                                                           | From 42 days after the index birth hospitalization discharge date | Date of outward migration or loss of OHIP eligibility | --                                                                                                  | --                                                   | --                              | RPDB                         |
|                                                                                             | December 31, 2020                                                 | End of study                                          | --                                                                                                  | --                                                   | --                              | --                           |
| <b><i>Variables for additional exposures occurring in conjunction with preeclampsia</i></b> | Any delivery hospitalization                                      | Preterm livebirth < 37 weeks' gestation               | Before 2002: 644.2, 765 [O60, P07.2, P07.3]<br><br>Since 2002: Gestational age < 37 completed weeks | --                                                   | --                              | --                           |
|                                                                                             | Any delivery hospitalization                                      | Stillbirth at 20+ weeks' gestation                    | --                                                                                                  | --                                                   | --                              | MOMBABY:<br>m_stillbirth='T' |

BORN Better Outcomes Registry and Network; CCP Canadian Classification of Diagnoses and Procedures; CCI Canadian Classification of Interventions; DAD Discharge Abstract Database; ICD-9 International Classification of Diseases, 9th Revision; ICD-10-CA International Classification of Diseases, 10th Revision, Canada; NACRS National Ambulatory Care Reporting System; OHIP Ontario Health Insurance Plan; RPDB Registered Persons Database; SDS Same Day Surgery Database; CCN Cardiac Care Network of Ontario.

**Table S2 (Additional analysis #1). Risk of developing obstructive coronary artery stenosis among women with vs. without a history of preeclampsia, January 2002 to March 2020, further adjusted for pre-pregnancy body mass index (BMI).** The time zero index date starts 42 days after the index birth hospitalization discharge date. [This analysis is limited to 286,836 women in whom pre-pregnancy BMI was known.](#)

| Exposure group                                  | Number of women with obstructive coronary artery stenosis (incidence rate per 10,000 person years, 95% CI) | Unadjusted hazard ratio (95% CI) | Adjusted hazard ratio (95% CI) <sup>a</sup> | Fully adjusted hazard ratio (95% CI) <sup>b</sup> |
|-------------------------------------------------|------------------------------------------------------------------------------------------------------------|----------------------------------|---------------------------------------------|---------------------------------------------------|
| <i>Women without preeclampsia (N = 278,841)</i> | 127 (0.52, 0.43 to 0.62)                                                                                   | 1.00 (Referent)                  | 1.00 (Referent)                             | 1.00 (Referent)                                   |
| <i>Women with preeclampsia (N = 7995)</i>       | 19 (2.72, 1.64 to 4.25)                                                                                    | 5.28 (3.26 to 8.57)              | 3.30 (1.90 to 5.72)                         | 1.94 (1.17 to 3.21)                               |

<sup>a</sup>Adjusted for maternal age, parity, neighbourhood income quintile (1 or missing, 2, 3, 4, 5), residence (rural, urban or missing) at the time of the index delivery, [pre-pregnancy BMI](#), as well as diabetes mellitus, chronic hypertension, renal disease, illicit drug/tobacco use, and dyslipidemia within 365 days preceding the index date.

<sup>b</sup>Further adjusted for time-varying diabetes mellitus, chronic hypertension, renal disease, drug dependence or tobacco use, and dyslipidemia – each arising at time zero onward, up to the day before the coronary angiography.

**Table S3. Risk of developing obstructive coronary artery stenosis in relation to a history of preeclampsia as a time-varying exposure, starting at each woman's first birth in the study period, January 2002 to March 2020. Preeclampsia is modelled in a time-varying manner as absent or present (Additional analysis #2a [upper]), or as absent, occurring once, or occurring at least twice (Additional analysis 2b [lower]).** The time zero index date starts 42 days after the first birth hospitalization discharge date.

| <b>Time-varying exposure group (number of person-years of follow-up)</b> | <b>Number of women with obstructive coronary artery stenosis (incidence rate per 10,000 person years, 95% CI)</b> | <b>Fully adjusted hazard ratio (95% CI)</b> |
|--------------------------------------------------------------------------|-------------------------------------------------------------------------------------------------------------------|---------------------------------------------|
| <i>Women without a history of preeclampsia (14,198,019 person-years)</i> | 1124 (0.79, 0.75 to 0.84)                                                                                         | 1.00 (Referent)                             |
| <i>Women with a history of preeclampsia (286,879 person-years)</i>       | 108 (3.76, 3.09 to 4.55)                                                                                          | 1.72 (1.40 to 2.11) <sup>a</sup>            |
|                                                                          |                                                                                                                   |                                             |
| <i>Women without preeclampsia (14,198,019 person-years)</i>              | 1124 (0.79, 0.75, 0.84)                                                                                           | 1.00 (Referent)                             |
| <i>Women with preeclampsia once (275,802 person-years)</i>               | 102 (3.70, 3.02 to 4.49)                                                                                          | 1.65 (1.34 to 2.04) <sup>b</sup>            |
| <i>Women with preeclampsia at least twice (11,077 person-years)</i>      | 6 (5.42, 1.99 to 11.79)                                                                                           | 1.63 (0.73 to 3.64) <sup>b</sup>            |

<sup>a</sup>Adjusted for maternal age, parity, neighbourhood income quintile (1 or missing, 2, 3, 4, 5), residence (rural, urban or missing) at the time of the first delivery, as well as time-varying diabetes mellitus, chronic hypertension, renal disease, drug dependence or tobacco use, and dyslipidemia – each arising at time zero onward, up to the day before the coronary angiography.

<sup>b</sup>Adjusted for maternal age, neighbourhood income quintile (1 or missing, 2, 3, 4, 5), residence (rural, urban or missing) at the time of the first delivery, as well as time-varying parity, diabetes mellitus, chronic hypertension, renal disease, drug dependence or tobacco use, and dyslipidemia – each arising at time zero onward, up to the day before the coronary angiography.



**Figure S1. Risk of multi-vessel obstructive coronary artery stenosis<sup>a</sup> associated with a history of preeclampsia.** Shown are unadjusted (*black squares*) and adjusted (*red diamonds*) hazard ratios<sup>b</sup> among women with preeclampsia, relative to those without preeclampsia (*black circles*)

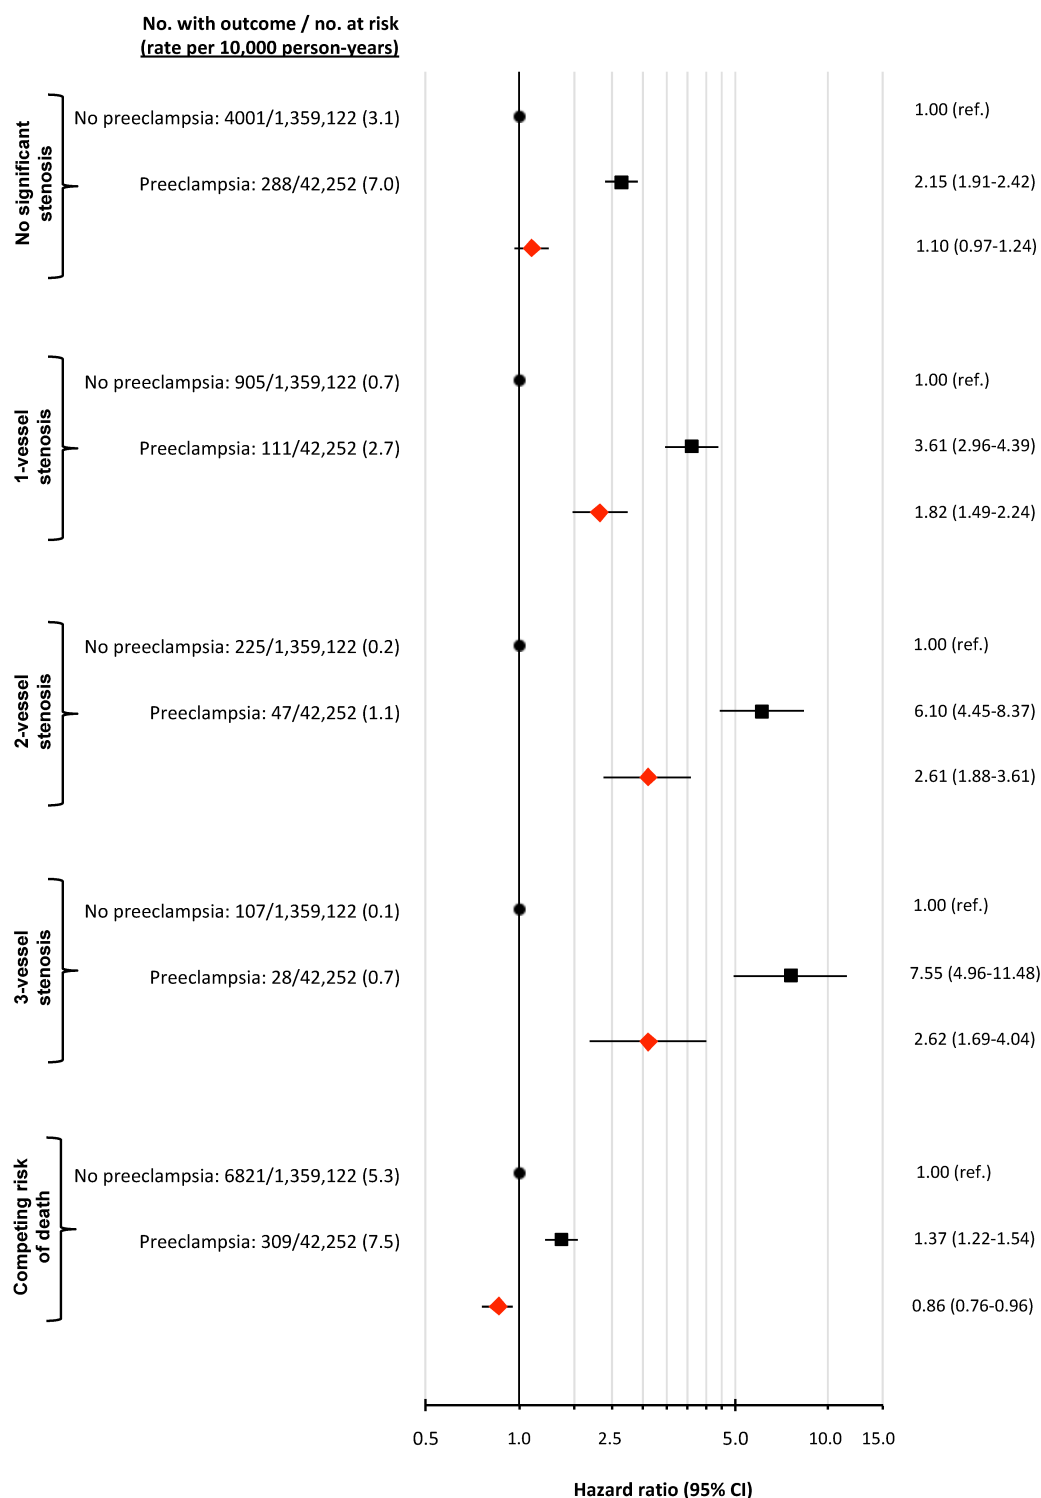

<sup>a</sup>a) No stenotic disease: < 50% stenosis in all coronary arteries, b) 1-vessel disease: ≥ 70% stenosis in one coronary artery, excluding left main coronary artery, c) 2-vessel disease: ≥ 70% stenosis in two coronary arteries (or ≥ 50% stenosis of left main coronary artery, or d) 3-vessel disease: ≥ 70% stenosis in three coronary arteries (or ≥ 50% stenosis in left main coronary artery + ≥ 70% stenosis in right coronary artery).

<sup>b</sup>Hazard ratios were generated using a competing risk model, and adjusted for maternal age, parity, income quintile, urban/rural residence, diabetes mellitus, chronic hypertension, renal disease, illicit drug/tobacco use, and dyslipidemia – each within 365 days preceding the index date, and further adjusted for time-varying type 1 or type 2 diabetes mellitus, chronic hypertension, renal disease, drug dependence or tobacco use, and dyslipidemia – each arising at 42 days after the index birth up to the day before the coronary angiography.
